1 **Affiliative social relationships and coccidian oocyst excretion in a cooperatively**  
2 **breeding bird species**

3 Claudia A.F. Wascher<sup>1</sup>, Daniela Canestrari<sup>2</sup> & Vittorio Baglione<sup>3</sup>

4

5 <sup>1</sup> School of Life Sciences, Anglia Ruskin University, United Kingdom

6 <sup>2</sup> Unidad Mixta de Investigación en Biodiversidad, Campus de Mieres, University of

7 Oviedo, Spain

8 <sup>3</sup> Departamento de Biodiversidad y Gestión Ambiental, Universidad de León, Spain

9

10

11

12

13

14 Short title: Parasite shedding and social relationships in crows

15

16 Corresponding author (present address):

17 Claudia A.F. Wascher: School of Life Sciences, Anglia Ruskin University, East Road,

18 Cambridge, CB1 1PT, United Kingdom; Phone: ++4369912381419; e-mail:

19 [claudia.wascher@gmail.com](mailto:claudia.wascher@gmail.com)

20

21

22

23

24

25

26

27 Abstract

28 In group living animals, behavioural interactions with conspecifics strongly modulate an  
29 individual's physiological stress response. Stable social relationships may reduce an  
30 individual's stress response, which in turn can affect the immune system and health.  
31 Ultimately, positive health effects of stable social bonds may contribute to maintain  
32 group living. We investigated whether, in cooperatively breeding carrion crows (*Corvus*  
33 *corone*), the quality of social relationships correlates with coccidian oocyst and  
34 nematode eggs excretion. We repeatedly collected behavioural data on dyadic social  
35 interactions and individual droppings to quantify parasite eggs and oocysts from 36  
36 individuals in a captive population of carrion crows in northern Spain. Individuals with  
37 strong social bonds, living with more relatives and in larger groups excreted a  
38 significantly smaller proportion of droppings containing coccidian oocysts. The  
39 probability to excrete droppings containing nematode eggs was not affected by social  
40 factors. The relationship between social interactions and coccidian oocyst excretion is  
41 consistent with the idea that high quality social relationships can positively affects  
42 individual's health, setting the stage for the evolution of stable social living.

43

44

45

46

47 *Key words:* carrion crows, coccidian oocysts, dominance rank, group size, parasites,  
48 social bonds.

49

50

51

52 **Introduction**

53 In group living animals the social environment directly affects an individual's  
54 physiology and health (DeVries, Glasper, & Detillion, 2003; Hanley & Stamps, 2002;  
55 Holst, 1998; Sheridan, Dobbs, Brown, & Zwillig, 1994). Adverse effects are caused,  
56 for example, by increased competition and aggressive behaviour (Chester, Bonu, &  
57 Demas, 2010; Hawley, Lindström, & Wikelski, 2006), which affect especially low-  
58 ranking individuals (Ungerfeld & Correa, 2007; Zuk, Kim, Robinson, & Johnsen,  
59 1998). Further, large group sizes increase the exposure to directly transmitted parasites  
60 (Côté & Poulin, 1995; Loehle, 1995) and social interaction patterns can also facilitate  
61 pathogen transmission (Drewe, 2010; Fouchet et al., 2012).

62

63 Affiliative behaviour and reliable social allies, on the other hand, have a stress-  
64 reducing effect (Frigerio, Weiss, Dittami, & Kotrschal, 2003; Sachser, Dürschlag, &  
65 Hirzel, 1998; Stöwe et al., 2008; Young, Majolo, Schülke, & Ostner, 2014). In several  
66 mammalian species, stable social bonds have a fitness enhancing effect (Schülke,  
67 Bhagavatula, Vigilant, & Ostner, 2010; Schülke et al., 2010; Silk et al., 2009, 2010b).  
68 Social relationships in female chacma baboons (*Papio hamadryas ursinus*) help coping  
69 with stressful events and increase longevity (Silk et al., 2010a), whereas social bonds in  
70 male Assamese macaques (*Macaca assamensis*) and feral horses (*Equus ferus caballus*)  
71 are directly linked to the number of offspring sired (Schülke et al., 2010). However, it  
72 has also been observed that poor health could influence the social behaviour of group  
73 living animals through sickness-induced behavioural modulation (Adelman & Martin,  
74 2009; Dantzer, O'Connor, Freund, Johnson, & Kelley, 2008; Klein, 2003)

75

76 In humans, a rich social network and social support yields measurable positive  
77 consequences for health (Berkman, 1995; Lisa. F. Berkman & Glass, 2000; Cassel,  
78 1976; Cobb, 1976; Kiecolt-Glaser, McGuire, Robles, & Glaser, 2002; Theorell et al.,  
79 1995; Uchino, Cacioppo, & Kiecolt-Glaser, 1996). Recent research, however, has  
80 shown that complex sociality associated with the formation of strong, long-lasting  
81 social bonds, is not unique to humans and closely related primate species (Pollen et al.,  
82 2007; Shultz & Dunbar, 2010b). This suggests the fascinating hypothesis that positive  
83 health effects of social bonds may contribute to maintain stable group living in a large  
84 variety of taxa and types of social organizations (Silk, 2007).

85  
86 Among birds, corvids show complex social relationships. Common ravens (*Corvus*  
87 *corax*), for example, are capable of forming valuable relationships, not only within  
88 reproductive pairs but also with social partners in their groups (Fraser & Bugnyar, 2012;  
89 Heinrich, 2011). Such bonds are characterized by low levels of aggression and high  
90 levels of affiliative behaviours exchanged in a reciprocal way over extended periods of  
91 time (Fraser & Bugnyar, 2010). Within such valuable relationships, individuals support  
92 each other in agonistic encounters (Emery, Seed, von Bayern, & Clayton, 2007; Fraser  
93 & Bugnyar, 2012) and share information and resources (Bugnyar, Kijne, & Kotrschal,  
94 2001; de Kort, Emery, & Clayton, 2006; Fraser & Bugnyar, 2012), whereas they  
95 typically act competitively with other non-bonded conspecifics (Bugnyar & Heinrich,  
96 2005, 2006). In the present study we investigated the benefits of social bonds in carrion  
97 crows (*Corvus corone*). In most European populations carrion crows form socially  
98 monogamous pairs during the breeding season (Glutz von Blotzheim, 1985; Meide,  
99 1984) whereas in northern Spain crows live in stable social groups of up to nine  
100 individuals, consisting of the breeding pair and retained offspring as well as male

101 immigrants (Baglione, Canestrari, Marcos, & Ekman, 2003). Group living in carrion  
102 crows is based on kinship (Baglione et al., 2003) and cooperation in nestling  
103 provisioning (Canestrari, Chiarati, Marcos, Ekman, & Baglione, 2008) and territory  
104 defence (Hillemann, et al. n.d.). Dominant males are more aggressive towards same sex  
105 group members compared to females (Chiarati, Canestrari, Vera, Marcos, & Baglione,  
106 2010) and are less aggressive towards related individuals than to unrelated ones  
107 (Chiarati, Canestrari, Vila, Vera, & Baglione, 2011). In previous experiments,  
108 attentiveness of captive crows towards visual or olfactory social stimuli was measured.  
109 Males watched non-kin more often than kin individuals (Wascher, Núñez Cebrián,  
110 Valdez, Canestrari, & Baglione, 2014) and, unlike females, showed less avoidance  
111 towards the scent of a stressed familiar individual, compared to a stressed unfamiliar  
112 one, which might reflect a stronger willingness to provide social support (Wascher,  
113 Heiss, Baglione, & Canestrari, 2015).

114

115 In this study, we investigated the correlation between the quality of individual's  
116 social relationships and the prevalence of gastrointestinal parasites in captive groups of  
117 carrion crows that varied in size and composition. In particular, we focused on the  
118 pattern of excretion of oocysts of coccidian protozoans and different nematode species,  
119 mainly *Syngamus trachea* and *Capillaria sp.* Coccidian oocysts are among the most  
120 common endoparasites of birds (López, Figuerola, & Soriguer, 2007; Page & Haddad,  
121 1995) and are widespread among corvids, including carrion crows (Cawthorn &  
122 Wobeser, 1985; Poon & Chew, 1991; Upton, Langen, & Wright, 1995). Infections with  
123 large numbers of coccidia clinically manifest as 'coccidiosis', which damages the  
124 intestinal tract (Conway & McKenzie, 2007) and severely affects individual body  
125 condition, longevity and fecundity by inhibiting the uptake of essential dietary

126 components (Hörak et al., 2004; Stenkewitz, Nielsen, Skírnisson, & Stefánsson, 2016).  
127 The pathogenicity is well documented in poultry (Allen, 1987; Allen & Fetterer, 2002;  
128 Allen, Lydon, & Danforth, 1997), and further evidence is accumulating in wild bird  
129 species (e.g. Brawner, Hill, & Sundermann, 2000; McGraw & Hill, 2000). Coccidia are  
130 transmitted via the faecal-oral route, when oocysts undergo sporogony and become  
131 infectious (typically within 24 hours after excretion) (Allen & Fetterer, 2002).  
132 Similarly, different nematode species are described as regular endo-parasites of  
133 different corvid species (Halajian et al., 2011; Loman, 1980). *Syngamus trachea* is  
134 usually located in the trachea of birds and can lead to severe respiratory distress and  
135 pulmonary lesions (Fernando, Stockdale, & Remmler, 1971; Nevarez, Gamble, Aczm,  
136 Tully, & Avian, 2002). *Capillaria* sp. infect the intestinal tract and clinical symptoms  
137 are weight loss, diarrhoea, regurgitation, anaemia and oral necrotic plaques (Schnieder,  
138 Boch, & Supperer, 2006). Different nematode species infect their avian hosts via a  
139 direct life cycle, when embryonated eggs are ingested. Nematode eggs have a prepatent  
140 period of several weeks (Ortlepp, 1923).

141

142 In the present manuscript we ask how social factors relate to parasite egg and oocysts  
143 excretion patterns. First, we ask whether group size is related to parasite eggs and  
144 oocysts excretion, as infections may spread more easily in crowded conditions. Second,  
145 we ask whether parasite eggs and oocysts excretion correlate with a) the quality of the  
146 social relationships, with individuals maintaining strong social bonds being less likely  
147 to be infected than those with weak social bonds; b) the presence of relatives in the  
148 group, through reduction of stressful conflicts and competition (Chiarati et al., 2011)  
149 that can impair the ability to fight against parasites (Schat & Skinner, 2008); and c) an  
150 individual's position in the dominance hierarchy, as dominance rank is known to

151 weaken the immune system either in subordinates or dominants, depending on the  
152 relative allostatic load of social status in the respective species (Goymann & Wingfield,  
153 2004).

154 **Methods**

155 *Ethical Note*

156 All procedures described in this manuscript were conducted in accordance with the  
157 guidelines for the treatment of animals in behavioural research of the Association for  
158 the Study of Animal Behaviour. Keeping crows in captivity and the procedures  
159 performed were authorized by Junta de Castilla y León (núcleo zoológico 005074/2008;  
160 EP/LE/358/2009).

161

162 *Study subjects*

163 We collected data during seven different phases (November 2008, December 2008 -  
164 January 2009, January - February 2013, May - June 2013, January - February 2014,  
165 May - June 2014, September - October 2014), from a total of 36 crows (17 females, 19  
166 males), which were housed in a large outdoor aviary (30 x 12 x 6 m) in Northern Spain.  
167 The aviary was located in Solanilla, León in 2008 and 2009 (42°37'25" N, 5°26'58"  
168 W), and moved location to Navafría, León in 2013 and 2014 (42°36'15" N, 5°26'56"  
169 W). The outdoor aviary resembled a natural situation as much as possible, with external  
170 walls and ceiling made of wire-net. It comprised four major compartments (12 x 6 x 3  
171 m) separated by wooden walls and connected through eight smaller testing  
172 compartments (3 x 3 x 3 m). Compartments were equipped with wooden perches,  
173 natural vegetation, rocks, and sheltered perches in the four corners, where the wire-net  
174 ceiling was covered with transparent plastic boarding. There was no artificial floor, but  
175 natural vegetation covered the ground. An enriched diet consisting of fruit, vegetables,  
176 bread, meat and milk products was provided on a daily basis. Water and dry food were  
177 available *ad libitum*.

178



179 Birds were kept in groups that mirrored the social aggregations that naturally occur in  
180 the wild (A) ‘Flock’: three or more juvenile individuals; (B) ‘Pairs’: adult male and  
181 adult female. (C) ‘Cooperative Family’: a reproductive pair with its own already  
182 independent offspring. In 2008, 2010 and 2012 crows were hand-raised and initially  
183 kept in juvenile flocks. When birds aged and needed to be separated because of  
184 increasing frequency of aggressions, this was decided according to observed behaviour  
185 in the flock, *i.e.* individuals showing high frequency of affiliative behaviour and spatial  
186 proximity where paired. In June 2008, two wild families were captured in their territory  
187 at Sobarriba, brought into the aviary and subsequently kept in captivity (for more  
188 details, see: Wascher, Núñez Cebrián, Valdez, Canestrari, & Baglione, 2014). Each  
189 group of crows was kept in a different compartment, with acoustic but not visual contact  
190 with the rest of the captive birds (supplementary figure 1). Birds changed over time  
191 (from 2008 to 2014), so new groups were housed in separate compartments of the  
192 aviary. In each phase of data collection, each group was housed in only one keeping  
193 compartment of the aviaries. Between phases, group composition, size and holding  
194 compartment could change (supplementary materials Table 1). Although birds did not  
195 move freely between compartments and therefore were spatially isolated from each  
196 other, they were all equally potentially exposed to parasite transmission as it occurs in  
197 the wild, due to the outdoor settings and lack of hygienic isolation of each compartment.  
198 Droppings were removed from the aviary on a regular basis, approximately every  
199 couple of months, but no disinfection was applied.

200

#### 201 *Behavioural data*

202 A total of 1180 individual focal observations were recorded. Each observation lasted  
203 5 minutes, and all occurring behaviours were recorded. For this study, we focused on

204 frequencies of agonistic behaviour (threat, chase flight, and fight) and affiliative  
205 behaviours (allopreening and sitting in contact). The identity of the interacting  
206 individuals was noted, as well as their role (initiator/receiver) and the outcome of the  
207 interaction (winner/loser). The loser of an interaction was defined as the individual  
208 retracting. All behavioural observations were recorded on video and analysed by one  
209 researcher (C.A.F.W.).

210

### 211 *Social bonds: the composite sociality index*

212 For each phase of data collection, we calculated a composite sociality index (CSI)  
213 for each crow dyad within a group according to Silk et al. (2010a). A CSI was  
214 constructed from two affiliative behaviours: contact sitting and allopreening. Note that  
215 we used mean values per observation instead of absolute numbers because the number  
216 of focal observations varied among individuals (supplementary Table 1). The higher the  
217 CSI of a dyad, as compared with the frequency of affiliative interactions observed in its  
218 entire group, the stronger the affiliative bond between the two individuals involved.  
219 Dyads with CSI higher than the average of the entire sample and lower rates of  
220 aggression compared to the average of the entire group, were classified as ‘bonded’. For  
221 each individual we calculated the maximum CSI value among all the dyads, reflecting  
222 the strongest affiliative relationship for each individual in the group.

223

### 224 *Agonistic encounters: Elo-rating*

225 We calculated the success of individuals in agonistic encounters using Elo-rating in  
226 ‘aniDom’ (Sánchez-Tójar et al. 2017). Elo-rating allows to track dynamic changes in  
227 rank over different phases of data collection, by rating each of the individuals

228 depending on the outcome of each single interaction (won or lost) and the probability of  
229 that outcome occurring (Neumann et al. 2011).

230

### 231 *Parasitological examination*

232 During the entire study period, 760 individual droppings were collected on 160 days  
233 of sample collection. A human observer was watching the crows from inside the aviary  
234 and opportunistically collected droppings directly after defecation, so that each sample  
235 could be assigned to a particular individual (supplementary Table 1). To avoid diurnal  
236 variation in parasite eggs and oocysts shedding, we only collected droppings in the  
237 morning between 0900-1200. For each individual, a maximum of three droppings were  
238 collected on each sampling day (mean  $\pm$  SE =  $1.256 \pm 0.238$ ). Samples were stored in a  
239 refrigerator and analysed within seven days after collection. Samples were examined for  
240 eggs and oocysts of intestinal parasites. In 2008, we used a modified version of the  
241 flotation method (Schnieder et al., 2006) to examine the occurrence of parasite eggs and  
242 oocysts in the droppings. Fresh droppings (0.1 g) were suspended in a 2 ml collecting  
243 tube with 1 ml saturated saline. Collection tubes were shaken for 10 seconds and  
244 afterwards centrifuged for 5 minutes at 3000 rpm. After centrifugation, the collection  
245 tubes were filled with saline solution and a cover slip (18 x 18 mm) was positioned onto  
246 the tube. The high density of the saline solution causes the parasite eggs and oocysts to  
247 float up and be caught on the cover slip (Carta & Carta, 2000). After 10 minutes, the  
248 cover slip was moved onto a microscope slide and the parasite eggs and oocysts were  
249 identified and counted. From January 2013 onwards, we used a two grid McMaster  
250 (Marienfeld) counting chamber to examine the occurrence of parasite eggs and oocysts  
251 in the droppings. The entire sample was weighed, then diluted with 3 ml saturated NaCl  
252 solution per 0.1 g of droppings and thoroughly mixed. Afterwards, the solution was

253 filled into both McMaster counting chambers. After 10 minutes of resting period we  
254 identified the parasite eggs and oocysts in both chambers. We used a compound  
255 microscope with 100-fold and 400-fold amplification to identify parasite eggs and  
256 oocysts. We found Coccidian oocysts, eggs of several nematode species (*Capillaria sp.*,  
257 *Ascarida sp.*, *Syngamus sp.*, *Heterakis sp.*, *Trichostrongylus tenius*) and cestode eggs to  
258 a varying degree. The proportion of positive samples was highest for coccidian oocysts  
259 (31 %,  $N = 760$ ). Nematode eggs were found in 9 % of samples and cestode eggs were  
260 only found in less than 1 % of samples. We therefore limited our statistical analysis to  
261 coccidian oocysts and nematode eggs and analysed their occurrence (presence/absence)  
262 in the droppings, a measure that is unaffected by the sampling method used (Cringoli et  
263 al., 2011; Rinaldia, Coles, Maurelli, Musella, & Cringoli, 2011).

264

#### 265 *Data analysis*

266 We analysed the factors affecting the proportion of droppings containing  
267 coccidian oocysts and nematode eggs in our housed crows using the *glmer* function  
268 using R v. 3.0.2 (R Core Team 2016) and the *glmer* function in the *lm4* package  
269 (version 1.1-19; Bates, et al. 2014). We calculated a GLMM with binomial error  
270 distribution and a two-vectors response variable comprising the number of infected and  
271 non-infected samples for each individual in any given period of data collection. Various  
272 model diagnostics were employed to confirm model validity (visual inspection of  
273 distribution of residuals, qq plots, residuals plotted against fitted values) none of which  
274 suggested violation of model assumptions. To assess multicollinearity between fixed  
275 factors, we calculated variance inflation factors (VIFs) using the *vif* function in the  
276 package *car* (Fox & Weisberg, 2011). VIFs for all factors were below 1.5, indicating  
277 that there was no issue with multicollinearity (Zuur, Ieno, Walker, Saveliev, & Smith,

278 2009). We based our model selection on second-order Akaike's Information Criterion  
279 values (AICc; Hurvich, Tsai, & Chih-Ling, 1989). We calculated the difference between  
280 the best model and each other possible model ( $\Delta\text{AICc}$ ) and ranked the model  
281 combinations according to their  $\Delta\text{AICc}$ , which provides an evaluation of the overall  
282 strength of each model in the candidate set. Multiple models qualified as the similarly  
283 good models, *i.e.*  $\Delta\text{AICc} \leq 2$  (Burnham, 2004; Burnham & Anderson, 2002) and  
284 therefore we applied a model averaging approach, which calculates model averaged  
285 parameters using the MuMIn package (version 1.15.6; Bartón, 2014). Full statistical  
286 models are presented in the supplementary materials (supplementary Table 2 and 3).  
287 Maximum CSI value, group size, number of related individuals, Elo-rating and sex were  
288 included as explanatory variables. For each model, we fitted individual identity as a  
289 random term to control for the potential dependence associated with multiple samples  
290 from the same individuals. To describe the variance explained by our models, we  
291 provide marginal and conditional  $R^2$  values that range from 0 to 1 and describe the  
292 proportion of variance explained by the fixed and by the fixed and random effects  
293 combined, respectively (Nakagawa & Schielzeth, 2013). We calculated marginal and  
294 conditional  $R^2$  values using the `r.squaredGLMM` function in MuMIn. Levels of  
295 significance were adjusted to  $P \leq 0.025$  according Bonferroni, to account for multiple  
296 testing of coccidia oocysts and nematode eggs.

297

## 298 **Results**

### 299 *Social bonds*

300 On average  $\pm$  standard error (SE) we recorded  $23.64 \pm 3.38$  affiliative  
301 interactions per individual as well as  $12.21 \pm 2.41$  interactions won and  $17.51 \pm 2.44$   
302 lost per individual. We observed 56 bonded dyads (out of 327 dyads in total), 37 of

303 which were male-female dyads (17 between related individuals and 20 between  
304 unrelated individuals), 11 were male-male (7 between related and 4 between unrelated  
305 individuals) and 8 female-female (7 related, 1 unrelated). Thirty-three dyads with CSI  
306 higher than the average of the entire sample but also higher rates of aggression, where  
307 not classed as bonded. On average  $\pm$  SE, males and females had  $1.58 \pm 0.41$  and  $1.53 \pm$   
308  $0.36$  bonded partners respectively. Mean CSI  $\pm$  SE between bonded dyads was  $2.73 \pm$   
309  $0.46$  for male-female dyads,  $4.06 \pm 0.76$  for female-female bonds and  $3 \pm 0.87$  for male-  
310 male bonds.

311

### 312 ***Occurrence of coccidian oocysts***

313 Overall, 235 samples from 26 individuals contained coccidian oocysts, out of a  
314 total of 760 samples. Coccidian oocysts occurred in 151 out of 459 samples in males  
315 (33 %) and 84 out of 301 samples in females (28 %). Maximum CSI value, the number  
316 of related individuals in the group, Elo-rating score and sex remained as fixed factors in  
317 the best models (Table 1). Crows with a strong affiliative relationship (maximum CSI  
318 value: estimate  $\pm$  SE =  $-0.11 \pm 0.02$ ,  $z = 4.28$ ,  $P < 0.001$ ) excreted a lower proportion of  
319 samples containing coccidian oocysts (Figures 1). A similar pattern occurred for  
320 individuals living in larger groups (estimate  $\pm$  SE =  $-0.07 \pm 0.01$ ,  $z = 4.59$ ,  $P < 0.001$ )  
321 and with more related individuals (estimate  $\pm$  SE =  $-0.07 \pm 0.03$ ,  $z = 2.6$ ,  $P = 0.01$ ). On  
322 average  $\pm$  standard error (SE) we recorded  $12.21 \pm 2.41$  interactions won and  $17.51 \pm$   
323  $2.44$  lost per individual. Dominance rank (estimate  $\pm$  SE =  $0.06 \pm 0.03$ ,  $z = 1.81$ ,  $P =$   
324  $0.07$ ) and sex (estimate  $\pm$  SE =  $-0.01 \pm 0.04$ ,  $z = 0.33$ ,  $P = 0.74$ ) did not significantly  
325 relate to the proportion of samples containing coccidian oocysts.

326

### 327 ***Occurrence of nematode eggs***

328 Overall, 69 samples from 23 individuals contained nematode eggs, out of the  
329 total of 760 samples collected in all the 36 individuals. None of the factors investigated  
330 significantly affected excretion patterns of nematode eggs (supplementary Table 3), in  
331 fact the null model was amongst the best models in the candidate set (Table 1).  
332

333 **Discussion**

334  
335         In the present study, we have shown that carrion crows with closely bonded  
336 social partners (high CSI scores) were less likely to excrete coccidian oocysts, which  
337 represent an important threat for health in birds (Hörak et al., 2004; Stenkewitz et al.,  
338 2016). Health correlates of high quality social ties have been reported in humans (*e.g.*  
339 Seeman, 1996). Similar evidence has been recently found in non-human primates  
340 (Schülke et al., 2010; Silk et al., 2010a), suggesting that the tendency to form strong  
341 social ties may have deep phylogenetic roots (Shultz & Dunbar, 2010a). Social  
342 complexity, however, is not limited to primate species. Indeed, coalition formation has  
343 been reported in several mammalian and bird species, *e.g.* African elephants (*Loxodonta*  
344 *africanus*) (Bates et al., 2008), spotted hyenas (*Crocutta crocutta*) (Holekamp, Sakai, &  
345 Lundrigan, 2007), bottlenose dolphins (*Tursiops aduncus*) (Connor & Krützen, 2015),  
346 ravens (Braun & Bugnyar, 2012), and carrion crows (Baglione et al., 2003). Our study  
347 uncovered that high quality social relationships correlate with reduced occurrence of  
348 parasites. From our present observational study, we cannot conclude about the causality  
349 of effects. Parasite burden could either be affected by social bonds showing a benefit of  
350 social relationships in group living animals, or could influence the social behaviour  
351 through sickness-induced behavioural modulation (Adelman & Martin, 2009; Dantzer,  
352 O'Connor, Freund, Johnson, & Kelley, 2008; Klein, 2003), or sickness-induced  
353 cognitive biases (Nettle & Bateson, 2012). Either way, our data illustrate the importance  
354 of physiological mechanisms underlying social behaviours and potential benefits  
355 associated to the social environment in birds that parallel those of primates (including  
356 humans) and suggesting a route towards advanced sociality that may be common to a  
357 variety of taxa.



358 Cooperatively breeding groups of carrion crows form through two different  
359 mechanisms, namely delayed dispersal of offspring, which remain in the natal territory  
360 with their parents and siblings (Baglione, Marcos, & Canestrari, 2002), and formation  
361 of long lasting social bonds among distant relatives, most often males, that share all-  
362 purpose territories and frequently mate polyandrously (Baglione et al., 2003; Baglione,  
363 Marcos, Canestrari, & Ekman, 2002). These bonds typically form when an immigrant  
364 male joins an established family group and allies with the same sex resident breeder, to  
365 whom it is related (Baglione et al., 2003). Cooperative breeding, with group members  
366 working together to raise the brood, can only arise once stable groups have formed  
367 (Canestrari, Marcos, & Baglione, 2005). Both offspring delayed dispersal and bonding  
368 between adult males are therefore necessary preceding steps that eventually lead to  
369 cooperation, which has to be considered a consequence rather than the cause for the  
370 formation of the social group (Ekman, Baglione, Egger, & Griesser, 2001; Ekman,  
371 Dickinson, Hatchwell, & Griesser, 2004; Hatchwell & Komdeur, 2000). In other words,  
372 to understand why carrion crows, as well as any other bird species, form groups we  
373 need to understand the advantages that sociality conveys, independently of the payoff  
374 derived from cooperation at the nest. In carrion crows, as well as in many other  
375 cooperatively breeding species, the benefits of delayed dispersal for offspring are well  
376 studied (Chiarati, Canestrari, Vera, & Baglione, 2012), but little is known about the  
377 advantages of forming long lasting social bonds outside the nuclear family. The  
378 correlation between social bonds and parasite burden found in this study is consistent  
379 with the idea that the health benefits of high-quality relationships extend beyond the  
380 bonds between parents and offspring or reproductive partners, and may be associated  
381 with a reduction of harmful endo-parasites. Ultimately, this may be an important factor  
382 for establishing stable relationships in groups. Further research is needed to confirm the

383 direction of the cause and effect relationship of these results. However, it should be  
384 noted that besides an effect of strong social bonds, we also found that the number of  
385 relatives in the group was negatively correlated with parasite oocyst excretion in carrion  
386 crows. Because group size and composition in this captive situation were obviously not  
387 under the control of the crows themselves, the reduced parasite burden in kin-based  
388 groups was likely to be a consequence, and not a cause, of the presence of relatives,  
389 suggesting that social bonds in general affect health and not vice-versa. Sociality is  
390 based on kinship in wild cooperatively breeding carrion crows. Offspring remain in the  
391 natal territory with their parents for years and more distant relatives are actively  
392 recruited to form cooperative alliances with the resident breeders (Baglione et al.,  
393 2003). As a result, social groups in cooperatively breeding carrion crow are extended  
394 families, comprising members with different degree of relatedness. Indirect fitness  
395 benefits are known to be a primary driver of kin-based sociality in many taxa of animals  
396 (Clutton-Brock, 2002). However, our results indicate that living with kin can also  
397 accrue immediate direct benefits to carrion crows through reduced infection by  
398 coccidia.

399

400 Increased exposure to parasites and disease transmission is considered as one of  
401 the major disadvantages of group living (Côté & Poulin, 1995). In our study, however,  
402 group size showed the opposite effect, with the probability of presence of coccidian  
403 oocysts decreasing in larger groups. This suggests that the benefits of sociality in crows  
404 are not dumped by the health risk of living in group, at least in the range of group sizes  
405 tested in this study. However, crows can also aggregate in larger flocks, typically in  
406 winter, when they roost and forage communally (Sonerund et al., 2002). The trade-off

407 between the benefits of sociality and risk of infection in these particular circumstances  
408 are yet to be assessed.

409

410 We only found effects of social factors in coccidia, but not in nematode species.  
411 One reason could be that the lower occurrence of nematode eggs compared to coccidian  
412 oocysts in the samples (12 % of samples contained nematode eggs and 24 % of samples  
413 contained coccidian oocysts) limited the power of our analysis. However, the different  
414 life cycles of different parasite species could also play a role. *Coccidia* sp. have a  
415 prepatent period of approximately one week, in contrast nematode species, *e.g.*  
416 *capillaria*, have a pre-patent period of 3 - 4 weeks (Schnieder et al., 2006). Therefore,  
417 we suggest that short-term changes in the immune system, which could be caused by  
418 suppressive effects of glucocorticoids in response to social interactions (Bartolomucci,  
419 2007), might have stronger effects on infection by coccidia compared to nematode  
420 species.

421

422 The present study was conducted in captive, mostly hand-raised individuals,  
423 because this allowed for repeated observations of individuals habituated to the presence  
424 of a human observer. Working in aviaries is a standard procedure to investigate social  
425 behaviour in corvids (Fraser & Bugnyar, 2012; Kondo & Hiraiwa-Hasegawa, 2015;  
426 Logan, Ostojić, & Clayton, 2013; Wascher, 2015) and although similar observational  
427 studies in the wild are desirable, they are difficult to realize, because corvids avert  
428 humans and are difficult to observe in the wild. However, differentiated affiliative  
429 social relationships have previously been described in wild ravens (Braun & Bugnyar,  
430 2012; Braun, Walsdorff, & Bugnyar, 2012) as well as carrion crows (Baglione et al.,  
431 2003) and types of social aggregations in the aviary, *e.g.* flock, pairs, families, reflect

432 actual forms of social aggregations observed in the wild (Baglione, Marcos, &  
433 Canestrari, 2002). The investigated parasite species are widespread among wild corvids,  
434 including carrion crows (Cawthorn & Wobeser, 1985; Poon & Chew, 1991; Upton et  
435 al., 1995) and have been found in wild carrion crows at the study site in northern Spain  
436 (Wascher, 2014).

437

#### 438 *Conclusions*

439 Social complexity has deep phylogenetic roots, being widespread in a wide  
440 variety of mammals and birds. Understanding its evolution, however, is difficult  
441 because of our scant knowledge of the fitness consequences of sophisticated social  
442 behaviour across taxa. We are just starting to fill the gaps, and this study shows a  
443 correlative relationship between the quality of social relationships and parasite shedding  
444 in a bird species that may underlie social bonding, setting the stage for a complex form  
445 of cooperation (cooperative breeding).

446

#### 447 **Acknowledgments**

448 We thank Kurt Kotrschal for feedback and discussion, Hugo Robles for statistical  
449 advice and Friederike Hillemann for help with droppings collection. Alfredo Sánchez-  
450 Tójar advised on calculation of dated individual Elo-rating trajectories. Further we  
451 would like to thank Bernhard Voelkl and two anonymous reviewers for valuable  
452 comments on earlier versions of the manuscript. This work was supported by the  
453 Spanish Plan Nacional I+D, project CGL2011-27260 and CGL2016-77636-P, to VB  
454 and a KWA ('kurzfristiges wissenschaftliches Auslandsstipendium') stipend of the  
455 University of Vienna to C.A.F.W..

456 **References**

- 457 Adelman, J. S., & Martin, L. B. (2009). Vertebrate sickness behaviors: adaptive and  
458 integrated neuroendocrine immune responses. *Integrative and Comparative*  
459 *Biology*, 49(3), 202–214.
- 460 Allen, P. C. (1987). Physiological responses of chicken gut tissue to coccidial infection:  
461 Comparative effects of *Eimeria acervulina* and *Eimeria mitis* on mucosal mass,  
462 carotenoid content, and brush border enzyme activity. *Poultry Science*, 66(8),  
463 1306–1315.
- 464 Allen, P. C., & Fetterer, R. H. (2002). Recent advances in biology and immunobiology  
465 of. *Cytokine*, 15(1), 58–65.
- 466 Allen, P. C., Lydon, J., & Danforth, H. D. (1997). Effects of components of *Artemisia*  
467 *annua* on coccidia infections in chickens. *Poultry Science*, 76(8), 1156–1163.
- 468 Baglione, V., & Canestrari, D. (2016). Carrion crows: Family living and helping in a  
469 flexible social system. In W. D. Koenig & J. L. Dickinson (Eds.), *Cooperative*  
470 *Breeding in Vertebrates: Studies of Ecology, Evolution, and Behavior* (pp. 97–  
471 114). Cambridge, UK: Cambridge University Press.
- 472 Baglione, V., Canestrari, D., Marcos, J. M., & Ekman, J. (2003). Kin selection in  
473 cooperative alliances of carrion crows. *Science*, 300(5627), 1947–1949.
- 474 Baglione, V., Marcos, J. M., & Canestrari, D. (2002). Cooperatively breeding groups of  
475 carrion crow (*Corvus corone corone*) in Northern Spain. *The Auk*, 119(3), 790–  
476 799.
- 477 Baglione, V., Marcos, M., Canestrari, D., & Ekman, J. A. N. (2002). Direct fitness  
478 benefits of group living in a complex cooperative society of carrion crows, *Corvus*  
479 *corone corone*. *Animal Behaviour*, 64, 887–893.
- 480 Bartolomucci, A. (2007). Social stress, immune functions and disease in rodents.

- 481 *Frontiers in Neuroendocrinology*, 28(1), 28–49.
- 482 Bartón, K. (2014). MuMIn: multi-model inference. R package version 1.12-2.,  
483 Retrieved from <http://cran.r-project.org/web/packages/MuMIn/index.html>
- 484 Bates, L. A., Lee, P. C., Njiraini, N., Poole, J. H., Sayialel, K., Sayialel, S., Moss, C.J.,  
485 Byrne, R. W. (2008). Do elephants show empathy? *Journal of Consciousness*  
486 *Studies*, 15(10), 204–225.
- 487 Bates, D., Mächler, M., Bolker, B., & Walker, S. (2014). Fitting linear mixed-effects  
488 models using lme4. *ArXiv*. Retrieved from <http://arxiv.org/abs/1406.5823>
- 489 Berkman, L. F. (1995). The role of social relations in health promotion. *Psychological*  
490 *Bulletin*, 57(3), 245–254.
- 491 Berkman, L. F., & Glass, T. (2000). Social integration, social networks, social support,  
492 and health. In L. F. Berkman & I. Kawachi (Eds.), *Social Epidemiology* (p. 137).  
493 Oxford, UK: Oxford University Press.
- 494 Braun, A., & Bugnyar, T. (2012). Social bonds and rank acquisition in raven nonbreeder  
495 aggregations. *Animal Behaviour*, 84(6), 1507–1515.
- 496 Braun, A., Walsdorff, T., & Bugnyar, T. (2012). Socialized sub-groups in a temporary  
497 stable raven flock? *Journal of Ornithology*, 15, 97–104.
- 498 Brawner, W. R., Hill, G. E., & Sundermann, C. A. (2000). Effects of coccidial and  
499 mycoplasmal infections on carotenoid-based plumage pigmentation in male house  
500 finches. *The Auk*, 117(4), 952–963.
- 501 Bugnyar, T., & Heinrich, B. (2005). Ravens, *Corvus corax*, differentiate between  
502 knowledgeable and ignorant competitors. *Proceedings of the Royal Society B:*  
503 *Biological Sciences*, 272(1573), 1641–1646.
- 504 Bugnyar, T., & Heinrich, B. (2006). Pilfering ravens, *Corvus corax*, adjust their  
505 behaviour to social context and identity of competitors. *Animal Cognition*, 9(4),

- 506 369–376.
- 507 Bugnyar, T., Kijne, M., & Kotrschal, K. (2001). Food calling in ravens: are yells  
508 referential signals? *Animal Behaviour*, *61*(5), 949–958.
- 509 Burnham, K. P. (2004). Multimodel Inference: Understanding AIC and BIC in model  
510 selection. *Sociological Methods & Research*, *33*(2), 261–304.
- 511 Burnham, K. P., & Anderson, D. R. (2002). *Model selection and multimodel inference:*  
512 *a practical information-theoretic approach*. New York: Springer.
- 513 Canestrari, D., Chiarati, E., Marcos, J. M., Ekman, J., & Baglione, V. (2008). Helpers  
514 but not breeders adjust provisioning effort to year-round territory resource  
515 availability in carrion crows. *Animal Behaviour*, *76*(3), 943–949.
- 516 Canestrari, D., Marcos, J., & Baglione, V. (2005). Effect of parentage and relatedness  
517 on the individual contribution to cooperative chick care in carrion crows *Corvus*  
518 *corone corone*. *Behavioral Ecology and Sociobiology*, *116*(5), 422–428.
- 519 Carta, L. K., & Carta, D. G. (2000). Nematode specific gravity profiles and applications  
520 to flotation extraction and taxonomy. *Nematology*, *2*(2), 201–210.
- 521 Cassel, J. (1976). The contribution of the social environment to host resistance.  
522 *Psychosomatic Medicine*, *104*(2), 107–123.
- 523 Cawthorn, R. J., & Wobeser, G. A. (1985). Exogenous and endogenous stages of  
524 *Isospora brachyrhynchi* sp. n.(Protozoa: Eimeriidae) from the American crow  
525 *Corvus brachyrhynchos* Brehm. *Canadian Journal of Zoology*, *63*(11), 2639–2645.
- 526 Chester, E. M., Bonu, T., & Demas, G. E. (2010). Social defeat differentially affects  
527 immune responses in Siberian hamsters (*Phodopus sungorus*). *Physiology &*  
528 *Behavior*, *101*(1), 53–58.
- 529 Chiarati, E., Canestrari, D., Vera, R., & Baglione, V. (2012). Subordinates benefit from  
530 exploratory dominants: response to novel food in cooperatively breeding carrion

- 531 crows. *Animal Behaviour*, 83(1), 103–109.
- 532 Chiarati, E., Canestrari, D., Vera, R., Marcos, J. M., & Baglione, V. (2010). Linear and  
533 stable dominance hierarchies in cooperative carrion crows. *Ethology*, 116(4), 346–  
534 356.
- 535 Chiarati, E., Canestrari, D., Vila, M., Vera, R., & Baglione, V. (2011). Nepotistic access  
536 to food resources in cooperatively breeding carrion crows. *Behavioral Ecology and*  
537 *Sociobiology*, 65, 1791-1800.
- 538 Clutton-Brock, T. (2002). Breeding Together: Kin selection and mutualism in  
539 cooperative vertebrates. *Science*, 296(5565), 69–72.
- 540 Cobb, S. (1976). The role of social relations in health promotion. *Psychosomatic*  
541 *Medicine*, 38(5), 300–314.
- 542 Connor, R. C., & Krützen, M. (2015). Male dolphin alliances in Shark Bay: Changing  
543 perspectives in a 30-year study. *Animal Behaviour*, 103, 223–235.
- 544 Conway, D. P., & McKenzie, M. E. (2007). *Poultry Coccidiosis. Diagnostic Testing*  
545 *and Procedures*. Iowa: Blackwell Scientific Publications.
- 546 Côté, I. M., & Poulin, R. (1995). Parasitism and group size in social animals: a meta-  
547 analysis. *Behavioral Ecology*, 6(2), 159.165.
- 548 Cringoli, G., Rinaldi, L., Maurelli, M. P., Morgoglione, M. E., Musella, V., & Utzinger,  
549 J. (2011). *Ancylostoma caninum*: Calibration and comparison of diagnostic  
550 accuracy of flotation in tube, McMaster and FLOTAC in faecal samples of dogs.  
551 *Experimental Parasitology*, 128, 32–37.
- 552 Dantzer, R., O'Connor, J. C., Freund, G. G., Johnson, R. W., & Kelley, K. W. (2008).  
553 From inflammation to sickness and depression: when the immune system  
554 subjugates the brain. *Nature Reviews. Neuroscience*, 9(1), 46–56.
- 555 de Kort, S. R., Emery, N. J., & Clayton, N. S. (2006). Food sharing in jackdaws, *Corvus*



- 556 *monedula*: what, why and with whom? *Animal Behaviour*, 72(2), 297–304.
- 557 De Vries, H., Stevens, J. M. G., & Vervaecke, H. (2006). Measuring and testing the  
558 steepness of dominance hierarchies. *Animal Behaviour*, 71(3), 585–592.
- 559 DeVries, A. C., Glasper, E. R., & Detillion, C. E. (2003). Social modulation of stress  
560 responses. *Physiology & Behavior*, 79(3), 399–407.
- 561 Drewe, J. a. (2010). Who infects whom? Social networks and tuberculosis transmission  
562 in wild meerkats. *Proceedings of the Royal Society B: Biological Sciences*,  
563 277(1681), 633–642.
- 564 Ekman, J., Baglione, V., Egger, S., & Griesser, M. (2001). Delayed dispersal: living  
565 under the reign of nepotistic parents. *The Auk*, 118(1), 1–10.
- 566 Ekman, J., Dickinson, J. L., Hatchwell, B. J., & Griesser, M. (2004). Delayed dispersal.  
567 In *Ecology and Evolution of Cooperative Breeding in Birds* (pp. 35–47).  
568 Cambridge, UK: Cambridge University Press.
- 569 Emery, N. J., Seed, A. M., von Bayern, A. M. P., & Clayton, N. S. (2007). Cognitive  
570 adaptations of social bonding in birds. *Philosophical Transactions of the Royal*  
571 *Society of London. Series B, Biological Sciences*, 362(1480), 489–505.
- 572 Engqvist, L. (2005). The mistreatment of covariate interaction terms in linear model  
573 analyses of behavioural and evolutionary ecology studies. *Animal Behaviour*,  
574 70(4), 967–971.
- 575 Fernando, A. M. A., Stockdale, P. H. G., & Remmler, O. (1971). The route of  
576 migration, development, and pathogenesis of *syngamus trachea* (Montagu, 1811)  
577 Chapin 1925, in pheasants. *The Journal of Parasitology*, 57, 107–116.
- 578 Fouchet, D., Verrier, D., Ngoubangoye, B., Souquiere, S., Makuwa, M., Kazanji, M., ...  
579 Pontier, D. (2012). Who infects whom? Social networks and tuberculosis  
580 transmission in wild meerkats. *Proceedings of the Royal Society B: Biological*

- 581 *Sciences*, 279(1742), 3426–3435.
- 582 Fox, J., & Weisberg, S. (2011). *An {R} Companion to Applied Regression*. (second edi).  
583 California: Sage Publications.
- 584 Fraser, O. N., & Bugnyar, T. (2010). The quality of social relationships in ravens.  
585 *Animal Behaviour*, 79(4), 927–933.
- 586 Fraser, O. N., & Bugnyar, T. (2012). Reciprocity of agonistic support in ravens. *Animal*  
587 *Behaviour*, 83(1), 171–177.
- 588 Frigerio, D., Weiss, B., Dittami, J., & Kotrschal, K. (2003). Social allies modulate  
589 corticosterone excretion and increase success in agonistic interactions in juvenile  
590 hand-raised graylag geese (*Anser anser*). *Canadian Journal of Zoology*, 81, 1746–  
591 1754.
- 592 Glutz von Blotzheim, U. N. (1985). *Handbuch der Vögel Mitteleuropas*. (U. N. Glutz  
593 von Blotzheim, Ed.). Wiesbaden: Aula-Verlag.
- 594 Goymann, W., & Wingfield, J. C. (2004). Allostatic load, social status and stress  
595 hormones: the costs of social status matter. *Animal Behaviour*, 67, 591–602.
- 596 Halajian, A., Eslami, A., Mobedi, I., Amin, O., Mariaux, J., Mansoori, J., & Tavakol, S.  
597 (2011). Gastrointestinal Helminths of Magpies (*Pica pica*), Rooks (*Corvus*  
598 *frugilegus*) and Carrion Crows (*Corvus corone*) in Mazandaran Province, North of  
599 Iran. *Iranian Journal of Parasitology*, 6(2), 38–44.
- 600 Hanley, K. A., & Stamps, J. A. (2002). Does corticosterone mediate bidirectional  
601 interactions between social behaviour and blood parasites in the juvenile black  
602 iguana, *Ctenosaura similis*? *Animal Behaviour*, 63(2), 311–322.
- 603 Hatchwell, B. J. B., & Komdeur, J. (2000). Ecological constraints, life history traits and  
604 the evolution of cooperative breeding. *Animal Behaviour*, 59(6), 1079–1086.
- 605 Hawley, D. M., Lindström, K., & Wikelski, M. (2006). Experimentally increased social

- 606 competition compromises humoral immune responses in house finches. *Hormones*  
607 *and Behavior*, 49(4), 417–424.
- 608 Heinrich, B. (2011). Conflict, cooperation, and cognition in the common raven.  
609 *Advances in the Study of Behavior*, 43, 189–237.
- 610 Hillemann, F., Canestrari, D., Fischer, J., Wascher, C.A.F., Baglione, V. (n.d.).  
611 Year-round territory defence in cooperatively breeding Carrion crows – an  
612 overlooked opportunity to study helping in avian cooperative breeders? in  
613 preparation.
- 614 Holekamp, K. E., Sakai, S. T., & Lundrigan, B. L. (2007). Social intelligence in the  
615 spotted hyena (*Crocuta crocuta*). *Philosophical Transactions of the Royal Society*  
616 *of London. Series B, Biological Sciences*, 362(1480), 523–538.
- 617 Holst, D. Von. (1998). The concept of stress and its relevance for animal behavior.  
618 *Advances in the Study of Behavior*, 37, 1–131.
- 619 Hőrak, P., Saks, L., Karu, U., Ots, I., Surai, P. F., & McGraw, K. J. (2004). How  
620 coccidian parasites affect health and appearance of greenfinches. *Journal of*  
621 *Animal Ecology*, 73(5), 935–947.
- 622 Hurvich, C., Tsai, C., & Chih-Ling, T. (1989). Regression and time series model  
623 selection in small samples. *Biometrika*, 76, 297–307.
- 624 Kiecolt-Glaser, J. K., McGuire, L., Robles, T. F., & Glaser, R. (2002).  
625 Psychoneuroimmunology: Psychological influences on immune function and  
626 health. *Journal of Consulting and Clinical Psychology*, 70(3), 537–547.
- 627 Klein, S. L. (2003). Parasite manipulation of the proximate mechanisms that mediate  
628 social behavior in vertebrates. *Physiology & Behavior*, 79(3), 441–449.
- 629 Kondo, N., & Hiraiwa-Hasegawa, M. (2015). The influence of social dominance on  
630 calling rate in the Large-billed crow (*Corvus macrorhynchos*). *Journal of*

- 631           *Ornithology*, 156, 775–782.
- 632   Loehle, C. (1995). Social barriers to pathogen transmission in wild animal populations.  
633           *Ecology*, 76(2), 326–335.
- 634   Logan, C. J., Ostojić, L., & Clayton, N. S. (2013). Rook, but not jackdaw, post-conflict  
635           third-party affiliation reduces aggression for aggressors. *Ethology*, 119(5), 427–  
636           435.
- 637   Loman, J. (1980). Reproduction in a population of the hooded crow *Corvus cornix*.  
638           *Holarctic Ecology*, 3, 26–35.
- 639   López, G., Figuerola, J., & Soriguer, R. (2007). Time of day, age and feeding habits  
640           influence coccidian oocyst shedding in wild passerines. *International Journal for*  
641           *Parasitology*, 37(5), 559–564.
- 642   McGraw, K. J., & Hill, G. E. (2000). Differential effects of endoparasitism on the  
643           expression of carotenoid- and melanin-based ornamental coloration. *Proceedings*  
644           *of the Royal Society B: Biological Sciences*, 267(1452), 1525–1531.
- 645   Meide, M. (1984). *Raben- und Nebelkrähe*. Magdeburg: Westarp Wissenschaften.
- 646   Moyers, S. C., & Kosarski, K. B. (2015). Interactions between social behaviour and the  
647           acute phase immune response in house finches. *Behaviour*, 152, 2039–2058.
- 648   Nakagawa, S., & Schielzeth, H. (2013). A general and simple method for obtaining R<sup>2</sup>  
649           from generalized linear mixed-effects models. *Methods in Ecology and Evolution*,  
650           4, 133–142.
- 651   Nettle, D., & Bateson, M. (2012). The evolutionary origins of mood and its disorders.  
652           *Current Biology*, 22(17), R712–21.
- 653   Neumann, C., Duboscq, J., Dubuc, C., & Ginting, A. (2011). Assessing dominance  
654           hierarchies: validation and advantages of progressive evaluation with Elo-rating.  
655           *Animal Behaviour*, 82(4), 911–921.

- 656 Nevarez, J. G., Gamble, K. C., Aczm, D., Tully, T. N., & Avian, D. A. (2002).  
657 *Syngamus trachea* infection in two red-and-yellow barbets (*Trachyphonus*  
658 *erythrocephalus*). *Journal of Avian Medicine and Surgery*, *16*, 31–33.
- 659 Ortlepp, R. J. (1923). The life-history of *Syngamus trachealis* (Montagu) v. Siebold, the  
660 gape-worm of chickens. *Journal of Helminthology*, *1*(3), 119–140.
- 661 Page, C. D., & Haddad, K. (1995). Coccidial infections in birds. *Seminars in Avian and*  
662 *Exotic Pet Medicine*, *4*(3), 138–144.
- 663 Pollen, A. A., Dobberfuhr, A. P., Scace, J., Igulu, M. M., Renn, S. C. P., Shumway, C.  
664 A., & Hofmann, H. A. (2007). Environmental complexity and social organization  
665 sculpt the brain in Lake Tanganyikan cichlid fish. *Brain, Behavior and Evolution*,  
666 *70*(1), 21–39.
- 667 Poon, S. K., & Chew, W. K. (1991). *Isoospora corvi* Ray, Shivnani, Oommen and  
668 Bhaskaran, 1952 from the common house crow (*Corvus splendens* Vieillot) of  
669 Selangor, peninsular Malaysia. *Folia Parasitologica*, *38*(3), 201–207.
- 670 Rinaldia, L., Coles, G. C., Maurelli, M. P., Musella, V., & Cringoli, G. (2011).  
671 Calibration and diagnostic accuracy of simple flotation, McMaster and FLOTAC  
672 for parasite egg counts in sheep. *Veterinary Parasitology*, *177*, 345–352.
- 673 Sachser, N., Dürschlag, M., & Hirzel, D. (1998). Social relationships and the  
674 management of stress. *Psychoneuroendocrinology*, *23*(8), 891–904.
- 675 Sánchez-Tójar, A., Schroeder, J., & Farine, D. R. (2017). A practical guide for inferring  
676 reliable dominance hierarchies and estimating their uncertainty. *Journal of Animal*  
677 *Ecology*, *87*(3), 594–608.
- 678 Schat, K. A., & Skinner, M. A. (2008). Avian immunosuppressive diseases and  
679 immune evasion. In F. Davison, B. Kaspers, & K. A. Schat (Eds.), *Avian*  
680 *Immunology* (pp. 299–322). Oxford, UK: Elsevier Academic Press.

- 681 Schnieder, T., Boch, J., & Supperer, R. (2006). *Veterinärmedizinische Parasitologie*.  
682 (T. Schnieder, J. Boch, & R. Supperer, Eds.) (6th ed.). Berlin: Parey.
- 683 Schülke, O., Bhagavatula, J., Vigilant, L., & Ostner, J. (2010). Social bonds enhance  
684 reproductive success in male macaques. *Current Biology*, 20(24), 2207–2210.
- 685 Seeman, T. E. (1996). Social ties and health: The benefits of social integration. *Annals*  
686 *of Epidemiology*, 6(5), 442–451.
- 687 Sheridan, J. F., Dobbs, C., Brown, D., & Zwillig, B. (1994). Psychoneuroimmunology:  
688 stress effects on pathogenesis and immunity during infection. *Clinical*  
689 *Microbiology Reviews*, 7(2), 200–212.
- 690 Shultz, S., & Dunbar, R. (2010a). Bondedness and sociality. *Behaviour*, 147(7), 775–  
691 803.
- 692 Shultz, S., & Dunbar, R. I. M. (2010b). Social bonds in birds are associated with brain  
693 size and contingent on the correlated evolution of life-history and increased  
694 parental investment. *Biological Journal of the Linnean Society*, 100(1), 111–123.
- 695 Silk, J. B. (2007). The adaptive value of sociality in mammalian groups. *Philosophical*  
696 *Transactions of the Royal Society B: Biological Sciences*, 362, 539–559.
- 697 Silk, J. B., Beehner, J. C., Bergman, T. J., Crockford, C., Engh, A. L., Moscovice, L. R.,  
698 Cheney, D. L. (2009). The benefits of social capital: close social bonds among  
699 female baboons enhance offspring survival. *Proceedings of the Royal Society B:*  
700 *Biological Sciences*, 276(1670), 3099–3104.
- 701 Silk, J. B., Beehner, J. C., Bergman, T. J., Crockford, C., Engh, A. L., Moscovice, L. R.,  
702 Cheney, D. L. (2010a). Female chacma baboons form strong, equitable, and  
703 enduring social bonds. *Behavioral Ecology and Sociobiology*, 64(11), 1733–1747.
- 704 Silk, J. B., Beehner, J. C., Bergman, T. J., Crockford, C., Engh, A. L., Moscovice, L. R.,  
705 Cheney, D. L. (2010b). Strong and consistent social bonds enhance the longevity

- 706 of female baboons. *Current Biology*, 20(15), 1359–1361.
- 707 Skaug, H., Fournier, D., Nielsen, A., Magnusson, A., & Bolker, B. (2013). Generalized  
708 linear mixed models using AD model builder. R Package v0.8.0.
- 709 Sonerud, G. A., Hansen, H., & Smedshaug, C. A. (2002). Individual roosting strategies  
710 in a flock-living bird: movement and social cohesion of hooded crows (*Corvus*  
711 *corone cornix*) from pre-roost gatherings to roost sites. *Behavioral Ecology and*  
712 *Sociobiology*, 51, 309–318.
- 713 Stenkewitz, U., Nielsen, Ó. K., Skírnisson, K., & Stefánsson, G. (2016). Host-parasite  
714 interactions and population dynamics of rock ptarmigan. *PLoS ONE*, 11(11), 1–19.
- 715 Stockmaier, S., Bolnick, D. I., Page, R. A., & Carter, G. G. (2018). An immune  
716 challenge reduces social grooming in vampire bats. *Animal Behaviour*, 140, 141–  
717 149.
- 718 Stöwe, M., Bugnyar, T., Schloegl, C., Heinrich, B., Kotrschal, K., & Möstl, E. (2008).  
719 Corticosterone excretion patterns and affiliative behavior over development in  
720 ravens (*Corvus corax*). *Hormones and Behavior*, 53(1), 208–216.
- 721 Team, R. C. (2016). R: a language and environment for statistical computing. Vienna,  
722 Austria: R foundation for statistical computing. Retrieved from [http://www.r-](http://www.r-project.org/)  
723 [project.org/](http://www.r-project.org/)
- 724 Theorell, T., Blomkvist, V., Jonsson, H., Schulman, S., Berntorp, E., & Stigendal, L.  
725 (1995). Social support and the development of immune function in human  
726 immunodeficiency virus infection. *Psychosomatic Medicine*, 57(1), 200–212.
- 727 Uchino, B. N., Cacioppo, J. T., & Kiecolt-Glaser, J. K. (1996). The relationship  
728 between social support and physiological processes: a review with emphasis on  
729 underlying mechanisms and implications for health. *Psychological Bulletin*,  
730 119(3), 488–531.

- 731 Ungerfeld, R., & Correa, O. (2007). Social dominance of female dairy goats influences  
732 the dynamics of gastrointestinal parasite eggs. *Applied Animal Behaviour Science*,  
733 *105*(1–3), 249–253.
- 734 Upton, S. J., Langen, T. A., & Wright, T. F. (1995). A new species of *Isospora*  
735 Schneider, 1881 (*Apicomplexa: Eimeriidae*) from the white-throated magpie jay  
736 *Calocitta formosa* (*Passeriformes: Corvidae*) from Costa Rica. *Systematic*  
737 *Parasitology*, *31*(3), 195–199.
- 738 Villanúa, D., Pérez-Rodríguez, L., Gortázar, C., Höfle, U., & Vinuela, J. (2006).  
739 Avoiding bias in parasite excretion estimates: The effect of sampling time and type  
740 of faeces. *Parasitology*, *133*(2), 251–259.
- 741 Wascher, C.A.F. (2014). [Prevalence of gastrointestinal parasite products in the  
742 droppings of wild, cooperatively-breeding carrion crows in Northern Spain],  
743 unpublished raw data.
- 744 Wascher, C. A. F. (2015). Individual performance in socio-cognitive tasks predicts  
745 social behaviour in carrion crows. *Behaviour*, *152*(5).
- 746 Wascher, C. A. F., Heiss, R. S., Baglione, V., & Canestrari, D. (2015). Behavioural  
747 responses to olfactory cues in carrion crows. *Behavioural Processes*, *111*, 1–5.
- 748 Wascher, C. A. F., Núñez Cebrián, C., Valdez, J. W., Canestrari, D., & Baglione, V.  
749 (2014). Social factors modulating attention patterns in carrion crows. *Behaviour*,  
750 *151*(5), 555–572.
- 751 Young, C., Majolo, B., Schülke, O., & Ostner, J. (2014). Male social bonds and rank  
752 predict supporter selection in cooperative aggression in wild Barbary macaques.  
753 *Animal Behaviour*, *95*, 23–32.
- 754 Zuk, M., Kim, T., Robinson, S., & Johnsen, T. (1998). Parasites influence social rank  
755 and morphology, but not mate choice, in female red junglefowl, *Gallus gallus*.



756        *Animal Behaviour*, 56(2), 493–499.

757        Zuur, A. F., Ieno, E. N., Walker, N. J., Saveliev, A. A., & Smith, G. M. (2009). *Mixed*

758        *Effects Models and Extension in Ecology With R*. New York: Springer.

759

760

761 **Appendix**

762 **Appendix Table 1: List of all focal individuals and background information**

| Name         | Sex | Age   | Phases       | Comp | Group  | Drop | Observ | CSI   | EloRat |
|--------------|-----|-------|--------------|------|--------|------|--------|-------|--------|
| Artemisa     | F   | adult | Nov2008      | BL1  | family | 7    | 9      | 3.14  | -153.3 |
| Batman       | M   | 2008  | Nov2008      | BL1  | family | 6    | 11     | 1.57  | -132.5 |
| BlackStripes | F   | 2011  | JanFeb2013   | BL2  | flock  | 10   | 25     | 0.87  | 160.4  |
| BluePoint    | M   | 2012  | JanFeb2013   | FR2  | flock  | 9    | 24     | 4.16  | -127.0 |
|              |     |       | MayJune2013  | FR2  | flock  | 20   | 22     | 2.03  | -92.75 |
| BlueStripes  | M   | 2012  | JanFeb2013   | FR2  | flock  | 6    | 25     | 2.42  | 334    |
|              |     |       | MayJune2013  | FR2  | flock  | 16   | 21     | 2.44  | 315.0  |
| Cabazon      | M   | 2010  | JanFeb2013   | FL2  | pair   | 7    | 20     | 0.35  | 188.0  |
|              |     |       | MayJune2013  | FL2  | pair   | 20   | 10     | 0.35  | 188.0  |
|              |     |       | JanFeb2014   | FL2  | pair   | 6    | 10     | 6.65  | 168.0  |
|              |     |       | MayJune2014  | FL2  | pair   | 14   | 10     | 4.74  | -112.0 |
|              |     |       | SeptOct2014  | FL2  | pair   | 12   | 9      | 0     | -112.0 |
| Caqui        | F   | 2008  | Nov2008      | BL1  | family | 6    | 11     | 2.1   | -223   |
| Castana      | F   | adult | Nov2008      | FL1  | family | 5    | 9      | 0.52  | -148.6 |
| Cerca        | M   | 2008  | Nov2008      | BL1  | family | 4    | 7      | 0     | 91.12  |
| Donald       | F   | 2008  | Nov2008      | FR1a | pair   | 19   | 10     | 3.67  | 100    |
|              |     |       | Dec2008      | FR1  | flock  | 14   | 20     | 1.36  | -148   |
| Fidel        | M   | adult | Nov2008      | FL1  | family | 4    | 10     | 0     | -69.18 |
| Flash        | F   | 2008  | Nov2008      | FR1a | pair   | 15   | 10     | 5.24  | -100   |
|              |     |       | Dec2008      | FR1  | flock  | 11   | 20     | 6.8   | 242.8  |
| GreenO       | M   | 2011  | JanFeb2013   | BL2  | flock  | 12   | 25     | 1.56  | -370.0 |
|              |     |       | MayJune2013  | BL2  | flock  | 10   | 23     | 1.63  | -363.4 |
|              |     |       | JanFeb2014   | BL2  | pair   | 7    | 10     | 0     | -369.7 |
|              |     |       | MayJune2014  | FR2  | pair   | 26   | 10     | 0     | -337.7 |
|              |     |       | SeptOct2014  | FR2  | pair   | 9    | 9      | 0     | -337.7 |
| GreenZ       | M   | 2011  | JanFeb2013   | BL2  | flock  | 5    | 25     | 0.52  | -8.34  |
|              |     |       | MayJune2013  | BL2  | flock  | 16   | 23     | 1.63  | -2.11  |
|              |     |       | JanFeb2014   | BL2  | pair   | 5    | 10     | 1.38  | -8.42  |
|              |     |       | MayJune2014  | BL2  | pair   | 28   | 10     | 0     | 5.8    |
|              |     |       | SeptOct2014  | BL2  | pair   | 12   | 9      | 0     | 5.8    |
| Horst        | M   | 2007  | Nov2008      | FL1  | family | 3    | 8      | 0     | -102.1 |
| Ibiza        | F   | 2010  | JanFeb2013   | BR2  | pair   | 11   | 20     | 0.69  | -100   |
|              |     |       | MayJune2013  | BR2  | pair   | 5    | 10     | 0.69  | -100   |
|              |     |       | JanFeb2014   | BR2  | family | 3    | 10     | 0.83  | -23.51 |
|              |     |       | MayJune2014  | BR2  | family | 14   | 10     | 2.84  | -92.43 |
|              |     |       | SeptOct2014  | BR2  | family | 5    | 8      | 3.21  | 49.73  |
| Juana        | M   | 2008  | Nov2008      | FR1b | pair   | 11   | 11     | 13.62 | -88.04 |
|              |     |       | Dec2008      | FR1  | flock  | 14   | 19     | 12.24 | -149.4 |
| Margherita   | M   | 2008  | Nov2008      | FR1c | pair   | 11   | 12     | 3.67  | 76.16  |
|              |     |       | Dec2008      | FR1  | flock  | 14   | 19     | 5.44  | -183.4 |
| Mari         | M   | 2008  | Nov2008      | FR1b | pair   | 7    | 11     | 9.95  | 88.04  |
|              |     |       | 2008 Dec2008 | FR1  | flock  | 10   | 18     | 2.04  | -415.4 |
| Martinez     | M   | 2010  | JanFeb2013   | BR2  | pair   | 12   | 20     | 0.52  | 100    |
|              |     |       | MayJune2013  | BR2  | pair   | 6    | 10     | 0.52  | 100    |
|              |     |       | JanFeb2014   | BR2  | family | 6    | 10     | 1.38  | 177.3  |
|              |     |       | MayJune2014  | BR2  | family | 10   | 10     | 3.32  | -2.49  |
|              |     |       | SepOct2014   | BR2  | family | 5    | 8      | 10.71 | -144.6 |
| Pelotudo     | M   | adult | Nov2008      | BL1  | family | 6    | 9      | 1.57  | 109.1  |
| Pity         | M   | 2008  | Nov2008      | FL1  | family | 5    | 9      | 0     | 242.3  |
| Pobla        | F   | 2010  | JanFeb2013   | FL2  | pair   | 17   | 20     | 2.77  | -188.0 |
|              |     |       | MayJune2013  | FL2  | pair   | 20   | 10     | 2.77  | -188.0 |
|              |     |       | JanFeb2014   | FL2  | pair   | 6    | 10     | 3.6   | -168.0 |
|              |     |       | MayJune2014  | FL2  | pair   | 11   | 10     | 5.68  | 112.0  |
| Pumuki       | F   | 2008  | Nov2008      | FL1  | family | 4    | 10     | 3.14  | -127.5 |

|              |   |      |             |      |        |    |    |      |        |
|--------------|---|------|-------------|------|--------|----|----|------|--------|
| RedCross     | F | 2012 | JanFeb2013  | FR2  | flock  | 4  | 25 | 3.64 | -156.0 |
|              |   |      | MayJune2013 | FR2  | flock  | 10 | 23 | 1.63 | -177.3 |
| RedPoint     | M | 2012 | JanFeb2013  | FR2  | flock  | 10 | 27 | 2.6  | 86.32  |
|              |   |      | MayJune2013 | FR2  | flock  | 15 | 22 | 4.07 | 67.88  |
| Robin        | F | 2008 | Nov2008     | BL1  | family | 2  | 11 | 0.52 | 308.7  |
| Sancho       | F | 2008 | Nov2008     | FL1  | family | 5  | 10 | 1.57 | 205.2  |
| Sigur        | F | 2008 | Nov2008     | FR1c | pair   | 10 | 12 | 7.33 | -76.16 |
|              |   |      | Dec2008     | FR1  | flock  | 9  | 20 | 7.48 | 186.6  |
| Sombra       | F | 2008 | Dec2008     | FR1  | flock  | 10 | 19 | 2.72 | 266.8  |
| Valencia     | M | 2013 | JanFeb2014  | BR2  | family | 6  | 10 | 0.28 | -100   |
|              |   |      | MayJune2014 | BR2  | family | 4  | 10 | 0.28 | -100   |
| White        | F | 2008 | JanFeb2013  | BL2  | flock  | 5  | 22 | 1.21 | 217.8  |
|              |   |      | MayJune2013 | BL2  | flock  | 12 | 20 | 2.44 | 237.4  |
|              |   |      | MayJune2014 | BL2  | flock  | 10 | 10 | 0    | 147.4  |
|              |   |      | SeptOct2014 | BL2  | flock  | 7  | 7  | 1.07 | 147.4  |
| WhiteCross   | M | 2012 | JanFeb2013  | FR2  | flock  | 6  | 20 | 2.25 | -58.45 |
|              |   |      | MayJune2013 | FR2  | flock  | 9  | 22 | 2.44 | -35.53 |
|              |   |      | JanFeb2014  | FR2  | pair   | 5  | 10 | 1.11 | 262.9  |
|              |   |      | MayJune2014 | FR2  | pair   | 6  | 10 | 0    | 248.7  |
| WhitePoint   | M | 2012 | JanFeb2013  | FR2  | flock  | 6  | 24 | 0.87 | 53.82  |
|              |   |      | MayJune2013 | FR2  | flock  | 13 | 22 | 1.22 | 63.43  |
| WhiteStripes | F | 2012 | JanFeb2013  | FR2  | flock  | 3  | 23 | 1.56 | -132.6 |
|              |   |      | MayJune2013 | FR2  | flock  | 5  | 22 | 2.03 | -140.7 |
|              |   |      | JanFeb2014  | FR2  | pair   | 7  | 10 | 0    | -160.6 |
|              |   |      | MayJune2014 | FR2  | pair   | 8  | 10 | 0    | -192.5 |
| Xufa         | F | 2013 | JanFeb2014  | BR2  | flock  | 3  | 10 | 1.38 | -153.7 |
|              |   |      | MayJune2014 | BR2  | flock  | 8  | 10 | 0.47 | -52.54 |

763 Sex (F = female, M = male), age (year of hatching; if not known, individuals are  
764 classified as adult), phases of data taking during which the individual was recorded,  
765 compartment (comp), group composition (group: family, flock, pair), number of  
766 droppings (drop) and behavioural focal observations (observ) collected, maximum  
767 composite sociality index (CSI), elo rating.

768  
769  
770  
771  
772  
773  
774  
775  
776  
777  
778  
779  
780  
781  
782

783 **Appendix Table 2:** Results of the full generalized mixed linear model investigating  
 784 factors relating to patterns of coccidian oocyst excretion. Bonferroni adjusted significant  
 785 values ( $P \leq 0.025$ ) are highlighted in bold.  
 786

| Parameters                    | Estimate $\pm$ SE                  | <i>z</i>     | <i>P</i>     | Odds Ratio   | Lower 2.5% CI | Upper 97.5% CI |
|-------------------------------|------------------------------------|--------------|--------------|--------------|---------------|----------------|
| Intercept                     | 0.1 $\pm$ 0.37                     | 0.28         | 0.78         | -0.031       | -0.67         | 0.83           |
| <b>Maximum CSI</b>            | <b>-0.15 <math>\pm</math> 0.05</b> | <b>-2.84</b> | <b>0.004</b> | <b>-0.14</b> | <b>-0.26</b>  | <b>-0.04</b>   |
| Group Size                    | -0.11 $\pm$ 0.07                   | -1.5         | 0.13         | -0.03        | -0.26         | 0.03           |
| Number of related individuals | -0.15 $\pm$ 0.1                    | -1.48        | 0.14         | -0.17        | -0.36         | 0.06           |
| Sex                           | -0.2 $\pm$ 0.32                    | -0.64        | 0.52         | -0.14        | -0.88         | 0.46           |
| Elo-rating                    | 0 $\pm$ 0                          | 1.85         | 0.06         | 0            | -0            | 0              |

787  
 788

789 **Appendix Table 3:** Results of the full generalized mixed linear model investigating  
 790 factors relating to patterns of nematode egg excretion. Bonferroni adjusted significant  
 791 values ( $P \leq 0.025$ ) are highlighted in bold.  
 792

| Parameters                    | Estimate $\pm$ SE                  | <i>z</i>     | <i>P</i>         | Odds Ratio   | Lower 2.5% CI | Upper 97.5% CI |
|-------------------------------|------------------------------------|--------------|------------------|--------------|---------------|----------------|
| <b>Intercept</b>              | <b>-3.19 <math>\pm</math> 0.54</b> | <b>-5.96</b> | <b>&lt;0.001</b> | <b>-3.19</b> | <b>-4.27</b>  | <b>-2.13</b>   |
| Maximum CSI                   | 0.02 $\pm$ 0.07                    | 0.34         | 0.72             | 0.02         | -0.13         | 0.16           |
| Group Size                    | 0.03 $\pm$ 0.08                    | 0.44         | 0.66             | 0.03         | -0.12         | 0.19           |
| Number of related individuals | -0.02 $\pm$ 0.15                   | -0.14        | 0.89             | -0.02        | -0.35         | 0.27           |
| Sex                           | 0.68 $\pm$ 0.48                    | 1.41         | 0.16             | 0.68         | -0.35         | 1.62           |
| Elo-rating                    | -0 $\pm$ 0                         | -0.58        | 0.56             | -0           | -0            | 0              |

793  
 794  
 795  
 796  
 797  
 798  
 799  
 800  
 801  
 802

803 **Table 1.** Model selection of analyses that examined the occurrence of coccidian  
 804 oocysts, related to maximum CSI value (max CSI), number of related individuals (nr  
 805 related), Elo-rating scores, group size and sex.  
 806

|                         | Models                                      | df | LogLik  | AICc   | $\Delta$ AICc | Weight | $R^2_{\text{marginal}}$ |
|-------------------------|---------------------------------------------|----|---------|--------|---------------|--------|-------------------------|
| (a)<br><i>Coccidia</i>  | Max CSI, Elo-rating, group size             | 5  | -165.45 | 341.7  | 0.00          | 0.15   | 0.0                     |
|                         | Max CSI, Elo-rating, nr related             | 5  | -165.58 | 341.95 | 0.25          | 0.13   | 0.09                    |
|                         | Max CSI, Elo-rating, group size, nr related | 6  | -164.44 | 342    | 0.31          | 0.13   | 0.09                    |
|                         | Max CSI, group size                         | 4  | -167.07 | 342.66 | 0.96          | 0.09   | 0.06                    |
|                         | Max CSI, group size, nr related             | 5  | -166.14 | 343.07 | 1.37          | 0.08   | 0.08                    |
|                         | Max CSI, nr related                         | 4  | -167.32 | 343.16 | 1.46          | 0.07   | 0.07                    |
|                         | Max CSI, Elo-rating, group size, sex        | 6  | -165.26 | 343.64 | 1.94          | 0.06   | 0.06                    |
| (b)<br><i>Nematodes</i> | Null model                                  | 2  | -103.42 | 210.99 | 0             | 0.16   | 0                       |
|                         | Sex                                         | 3  | -102.57 | 211.46 | 0.47          | 0.13   | 0.02                    |
|                         | Elo-rating                                  | 3  | -103.27 | 212.85 | 1.86          | 0.06   | 0                       |

807 Individual identity was fitted as a random term in all models. LogLik: log-likelihood,  
 808 df: degrees of freedom,  $\Delta$ AICc: difference in AICc to the best model, marginal and  
 809 conditional  $R^2$ . Models are ranked according to their Akaike weight (Weight).  
 810  
 811  
 812  
 813  
 814  
 815  
 816  
 817  
 818  
 819  
 820  
 821  
 822

823 **Table 2.** Results of model averaged generalized linear mixed model investigating  
824 factors affecting patterns of coccidian oocyst excretion.  
825

| Parameters        | Estimate ± SE       | z           | P                |
|-------------------|---------------------|-------------|------------------|
| <b>Max CSI</b>    | <b>-0.11 ± 0.02</b> | <b>4.28</b> | <b>&lt;0.001</b> |
| <b>Group size</b> | <b>-0.07 ± 0.01</b> | <b>4.59</b> | <b>&lt;0.001</b> |
| <b>Nr related</b> | <b>-0.07 ± 0.03</b> | <b>2.6</b>  | <b>0.01</b>      |
| Elo-rating        | 0.06 ± 0.03         | 1.81        | 0.07             |
| Sex               | -0.01 ± 0.04        | 0.33        | 0.74             |

826 Significant values (Bonferroni corrected alpha-level: P<0.025) are highlighted in bold.

827  
828  
829  
830  
831  
832  
833  
834  
835  
836  
837  
838  
839  
840  
841  
842  
843  
844  
845  
846  
847  
848  
849  
850  
851  
852  
853  
854  
855  
856  
857  
858  
859  
860  
861  
862

863 **Figure 1.**

864 Percentage of samples containing coccidian oocysts in carrion crow droppings in relation  
865 to the maximum CSI. The predicted values are shown as solid line and 95% CI as  
866 shaded area. Black dots present individual values per phase.

867

868

869 **Figure A1.**

870 Sketch of the aviary setup. Aviary consisted of four separate compartments, in visual,  
871 but not acoustic separation from each other. Aviary was kept in two separate locations,  
872 in La Solanilla, León in 2008 and 2009 (42°37'23.4336 N, 5°27'3.1788 W), and  
873 Navafría, León in 2013 and 2014 (42°36'33, N 5°26'56 W).



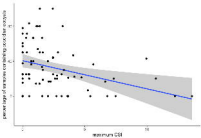

2008/09: BL1  
2013/14: BL2

2008/09: BR1  
2013/14: BR2

2008/09: FL1  
2013/14: FL2

2008/09: FR1 a-c  
2013/14: FR2
